# Supplementary material for: Comparison of small n statistical tests of differential expression applied to microarrays
Source: PubMed Central journal article supplement (PMC2674054; doi:10.1186/1471-2105-10-45), 2009-02-03
Supplement: 1471-2105-10-45-S1.pdf [file 1471-2105-10-45-S1.pdf]

Supplementary Materials: Comparison of  
small n statistical tests of differential  
expression applied to microarrays  
Additional File 1

Carl Murie, Owen Woody, Anna Y. Lee , Robert Nadon

January 27, 2009

## **1 MvA plots of cDNA data**

The blue line in the MvA graphs shows the lowess fit of only the non-spike data points. The purple line in the MvA graph shows the lowess fit of both the spikes and non-spikes. In all cases the two lowess fits are virtually identical.

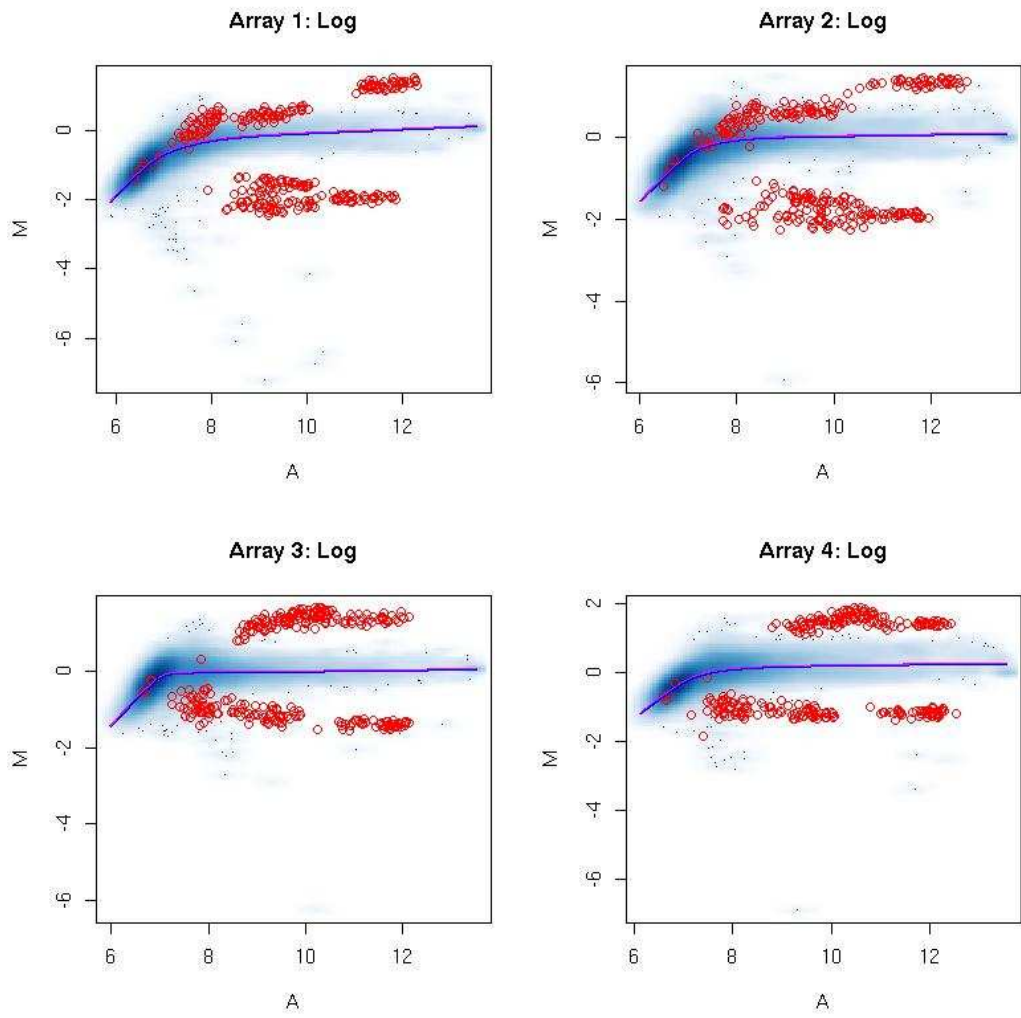

Figure 1: Liver3v5 MvA plot with log data. Red points are spikes and blue points are non-spikes.

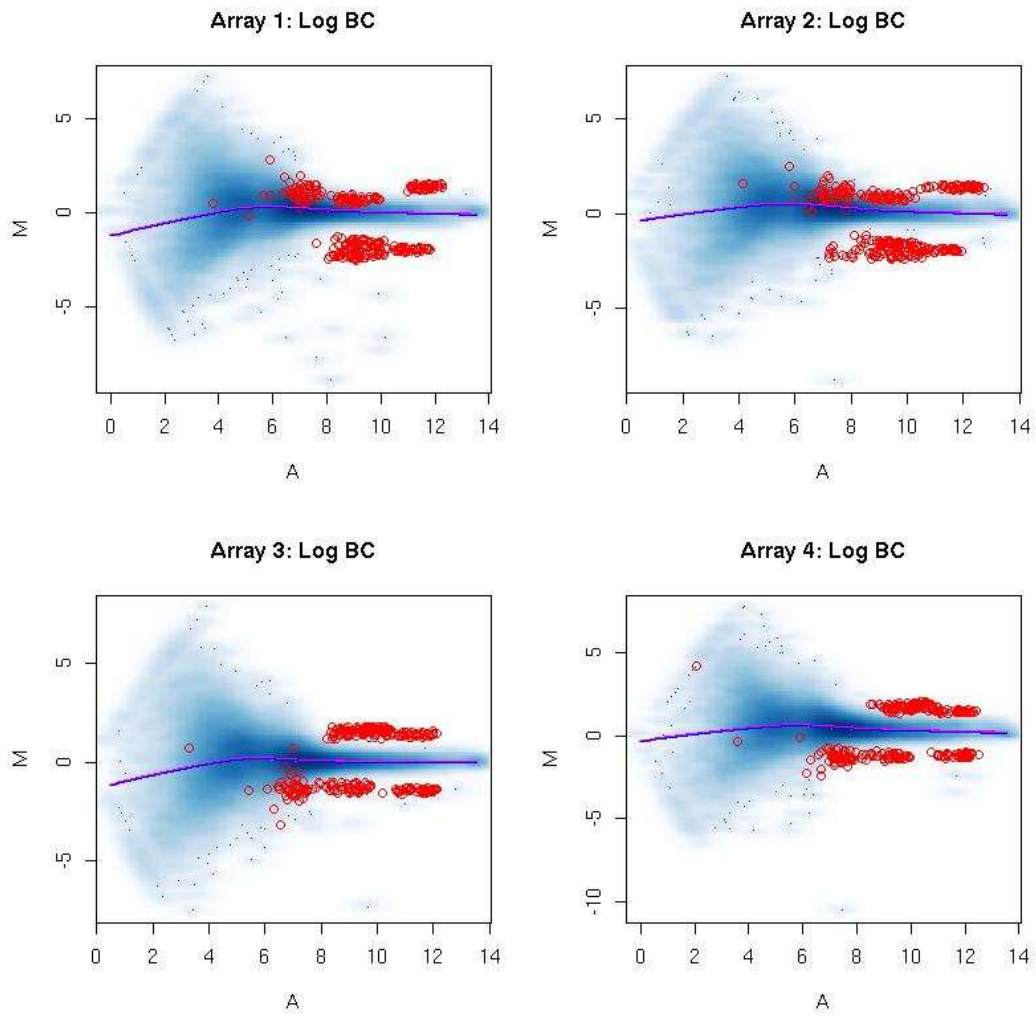

Figure 2: Liver3v5 MvA plot with log data after background correction. Red points are spikes and blue points are non-spikes.

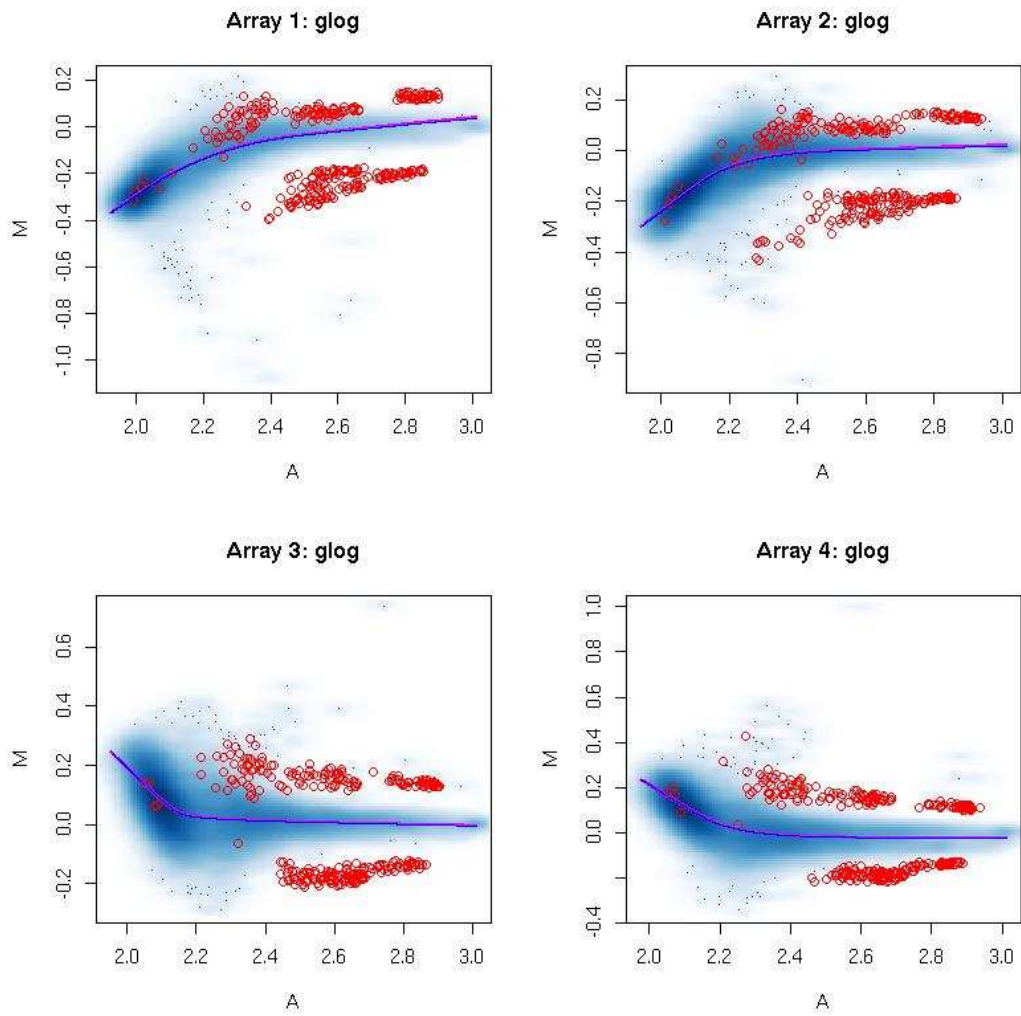

Figure 3: Liver3v5 MvA plot with glog data. Red points are spikes and blue points are non-spikes.

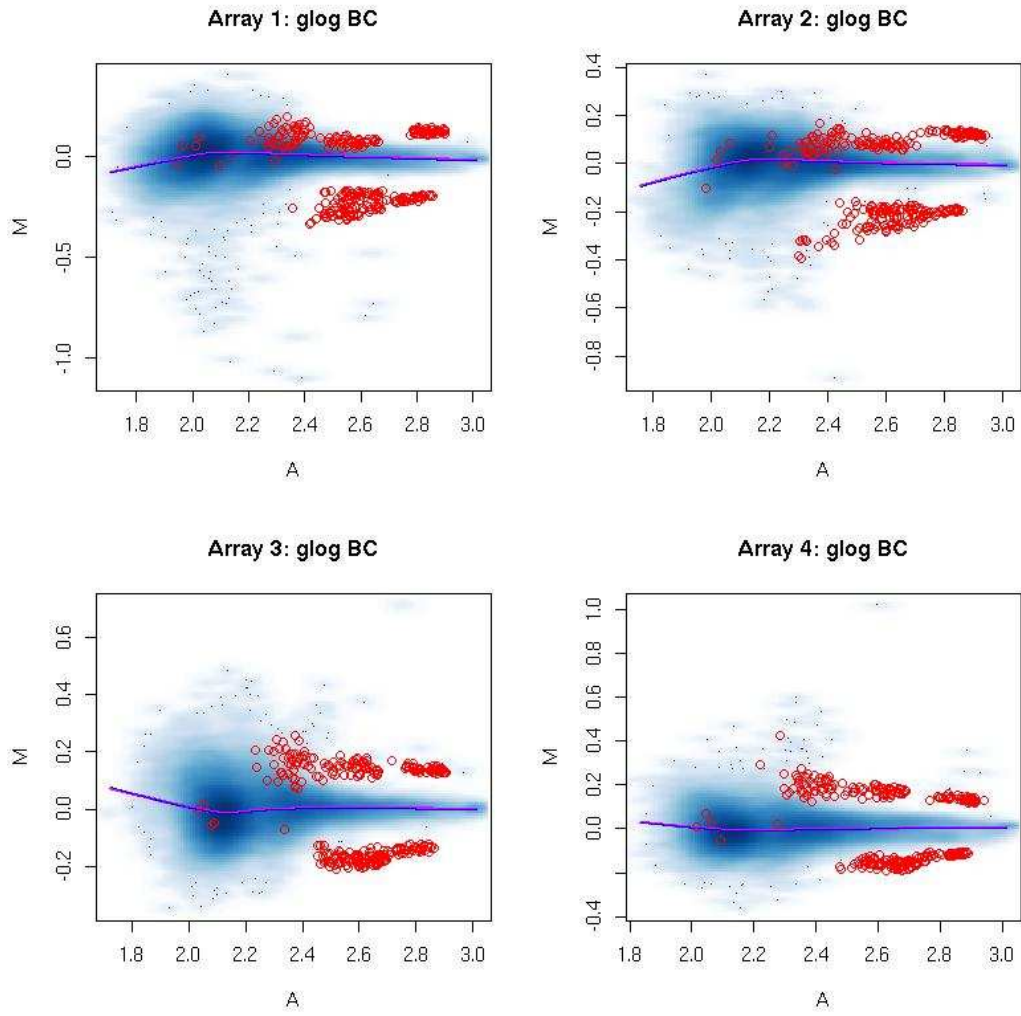

Figure 4: Liver3v5 MvA plot with glog data after background correction. Red points are spikes and blue points are non-spikes.

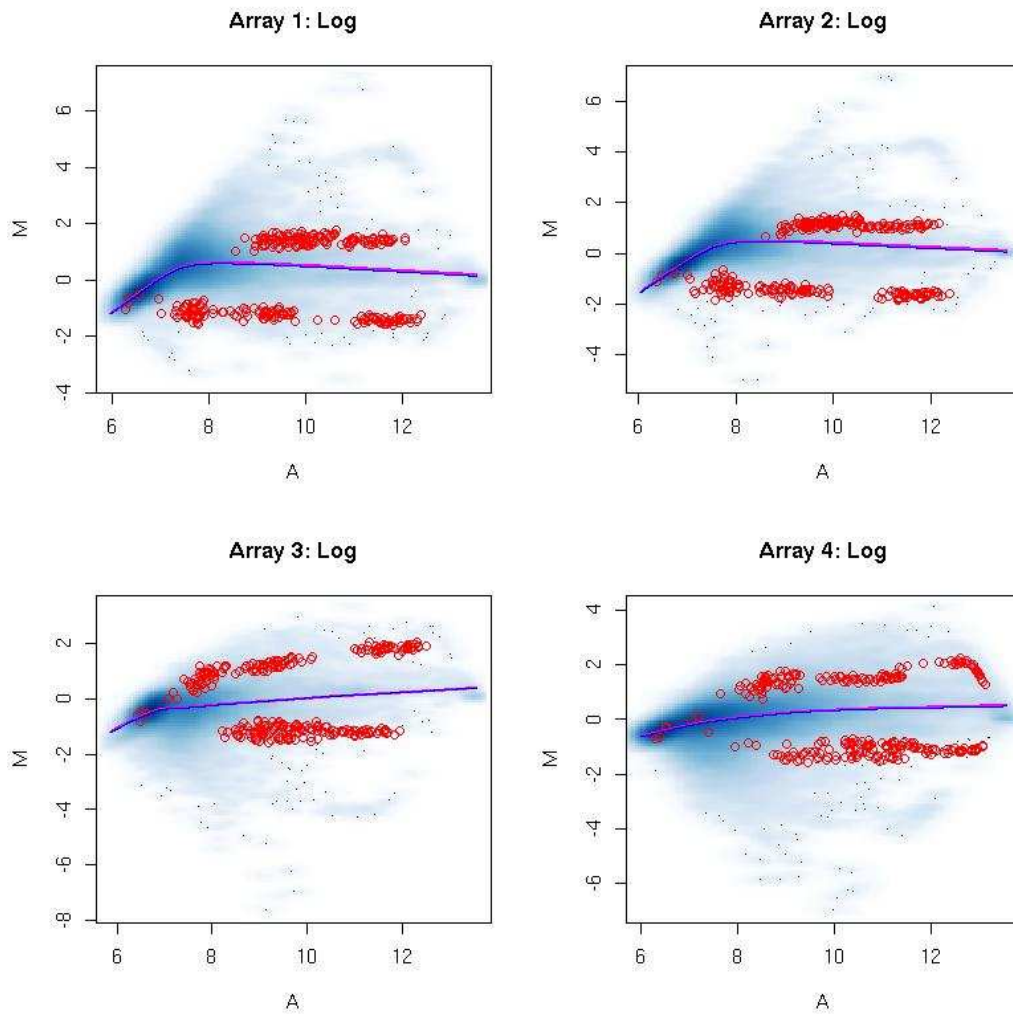

Figure 5: Liver pooled MvA plot with log dat. Red points are spikes and blue points are non-spikes.a

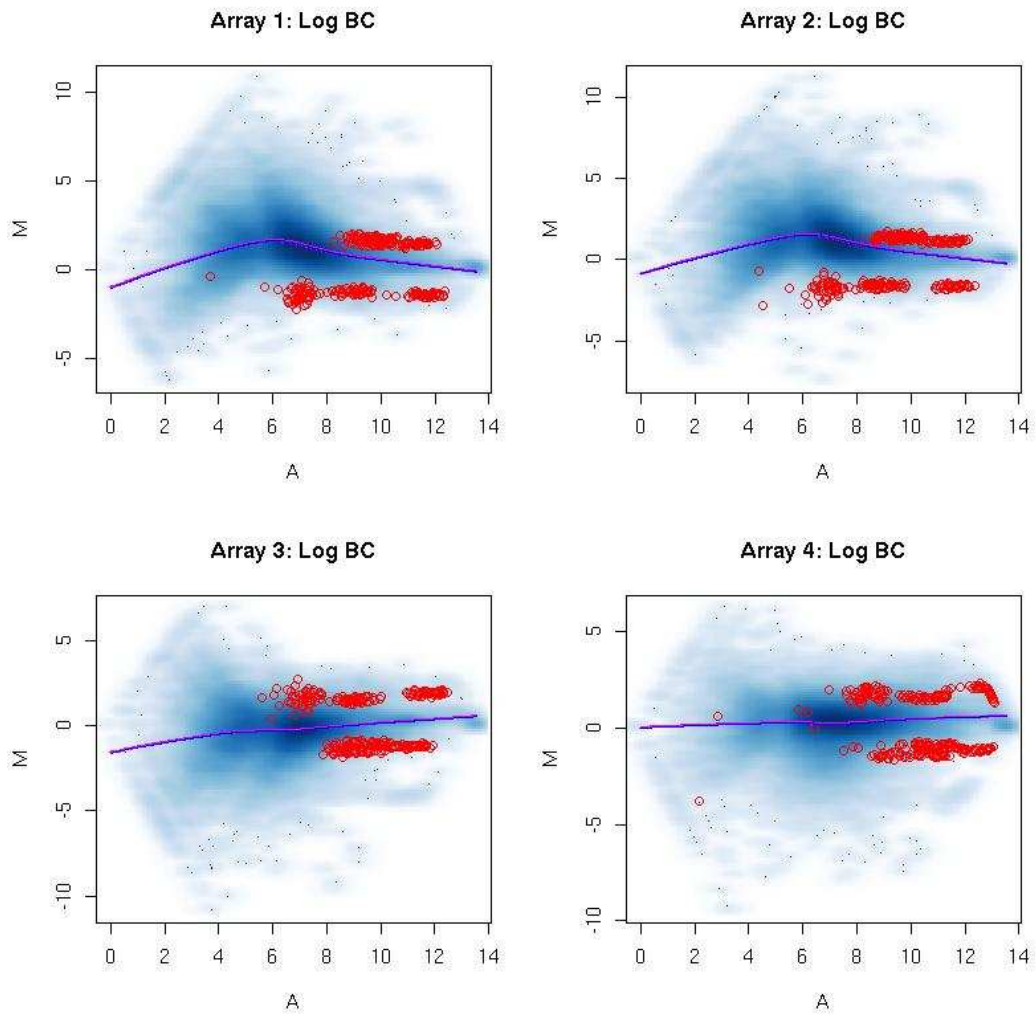

Figure 6: Liver pooled MvA plot with log data after background correction. Red points are spikes and blue points are non-spikes.

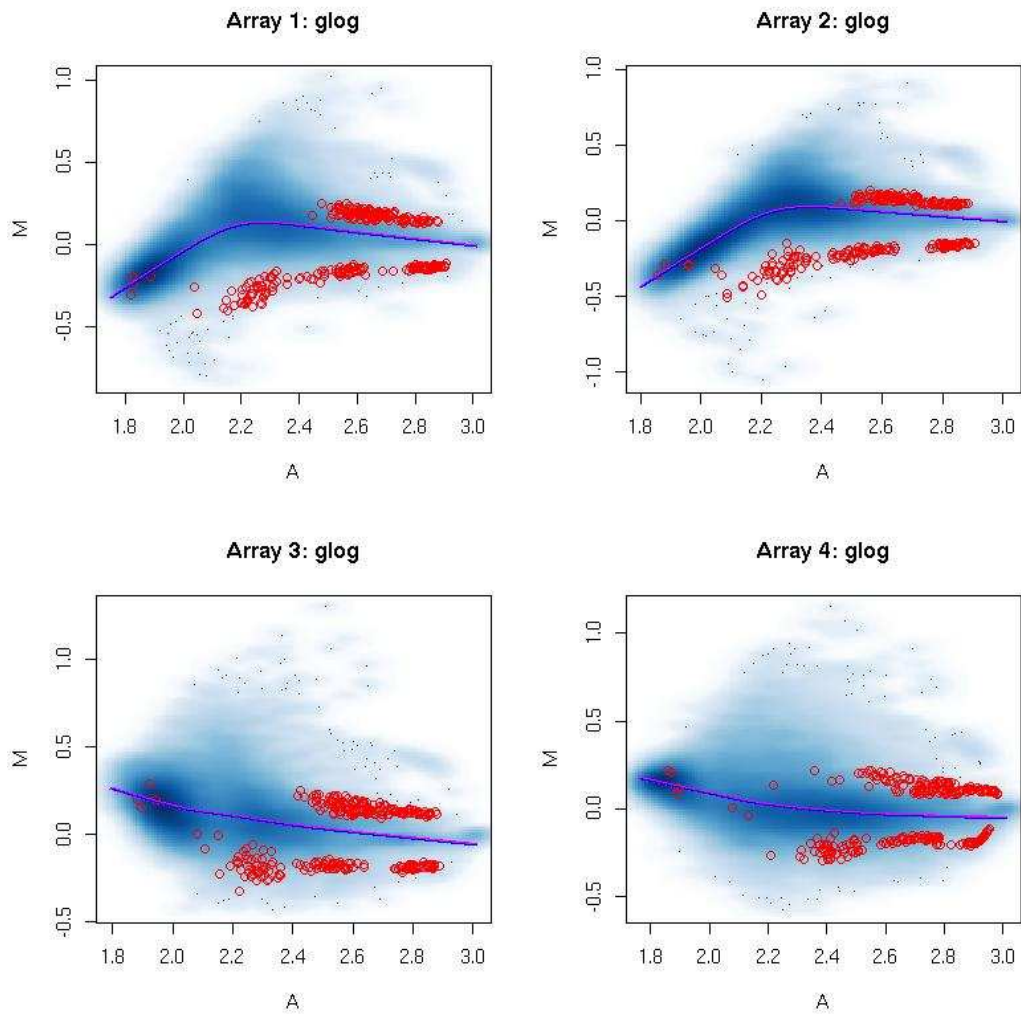

Figure 7: Liver pooled MvA plot with glog data. Red points are spikes and blue points are non-spikes.



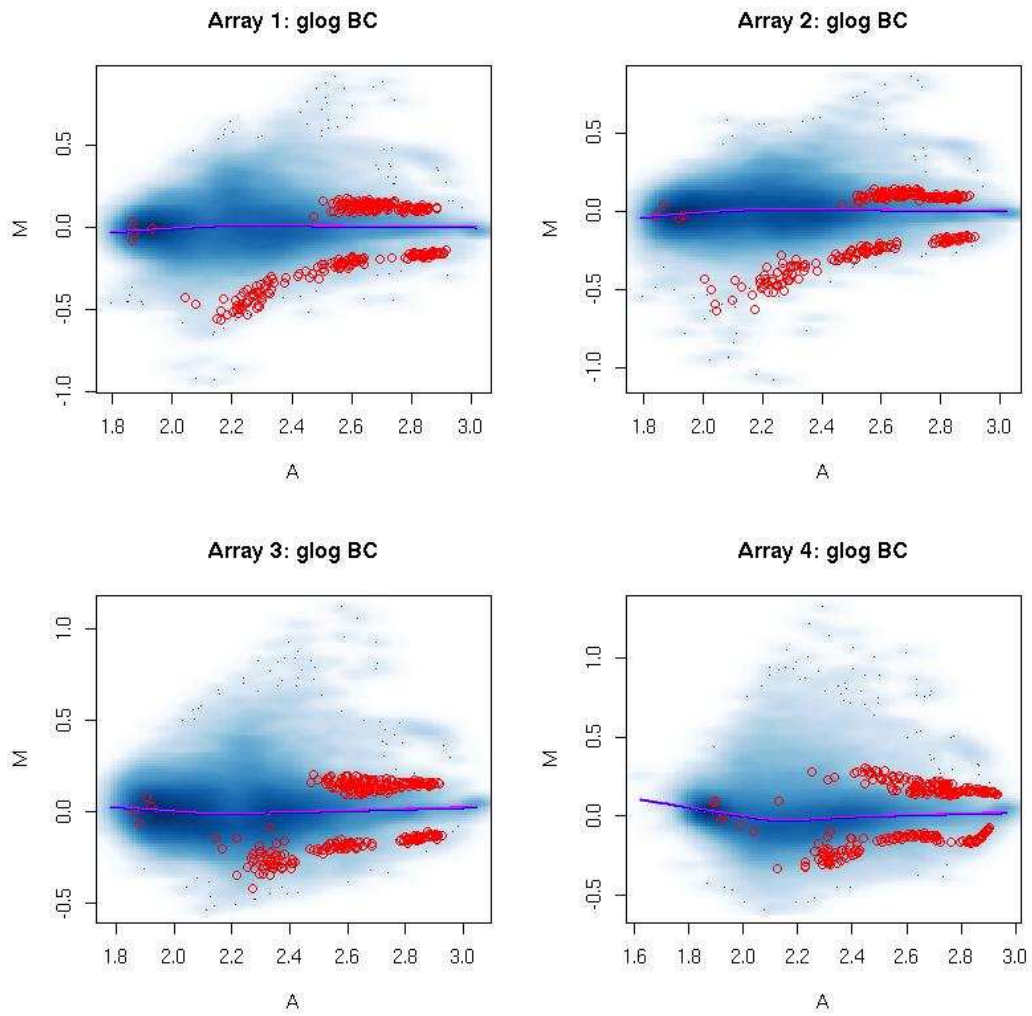

Figure 8: Liver pooled MvA plot with glog data after background correction. Red points are spikes and blue points are non-spikes.
