# Supplementary material for: Comparison of small n statistical tests of differential expression applied to microarrays
Source: PubMed Central journal article supplement (PMC2674054; doi:10.1186/1471-2105-10-45), 2009-02-03
Supplement: 1471-2105-10-45-S2.pdf [file 1471-2105-10-45-S2.pdf]

# Supplementary Materials: Comparison of small n statistical tests of differential expression applied to microarrays Additional File 2

Carl Murie, Owen Woody, Anna Y. Lee , Robert Nadon

January 27, 2009

## 1 Source Code Availability

- R statistical language - version 2.5.1  
(<http://www.r-project.org>)
- MAS 5.0:  
bioconductor affy library - version 1.13  
(<http://www.bioconductor.org>)
- RMA:  
bioconductor affy library - version 1.13  
(<http://www.bioconductor.org>)
- gcRMA:  
bioconductor affy library - version 1.13  
(<http://www.bioconductor.org>)
- dChip:  
bioconductor affy library - version 1.13  
(<http://www.bioconductor.org>)
- LPE z statistic:  
bioconductor LPE library - version 1.10  
(<http://www.bioconductor.org>)

- LMGene:  
bioconductor LMGene library - version 1.6  
(<http://www.bioconductor.org>)
- limma:  
bioconductor limma library - 2.10.5  
(<http://www.bioconductor.org>)
- BRB t-statistic:  
Wright and Simon -BRB Array Tools  
(<http://linus.nci.nih.gov/BRB-ArrayTools.html>)
- CyberT t-statistic:  
(<http://cybert.microarray.ics.uci.edu/>)
