# Supplementary material for: Comparison of small n statistical tests of differential expression applied to microarrays
Source: PubMed Central journal article supplement (PMC2674054; doi:10.1186/1471-2105-10-45), 2009-02-03
Supplement: 1471-2105-10-45-S3.pdf [file 1471-2105-10-45-S3.pdf]

Supplementary Materials: Comparison of  
small n statistical tests of differential  
expression applied to microarrays  
Additional File 3

Carl Murie, Owen Woody, Anna Y. Lee , Robert Nadon

January 27, 2009

**1 Histograms of logged and unlogged vari-  
ances for limma and BRB statistical tests**

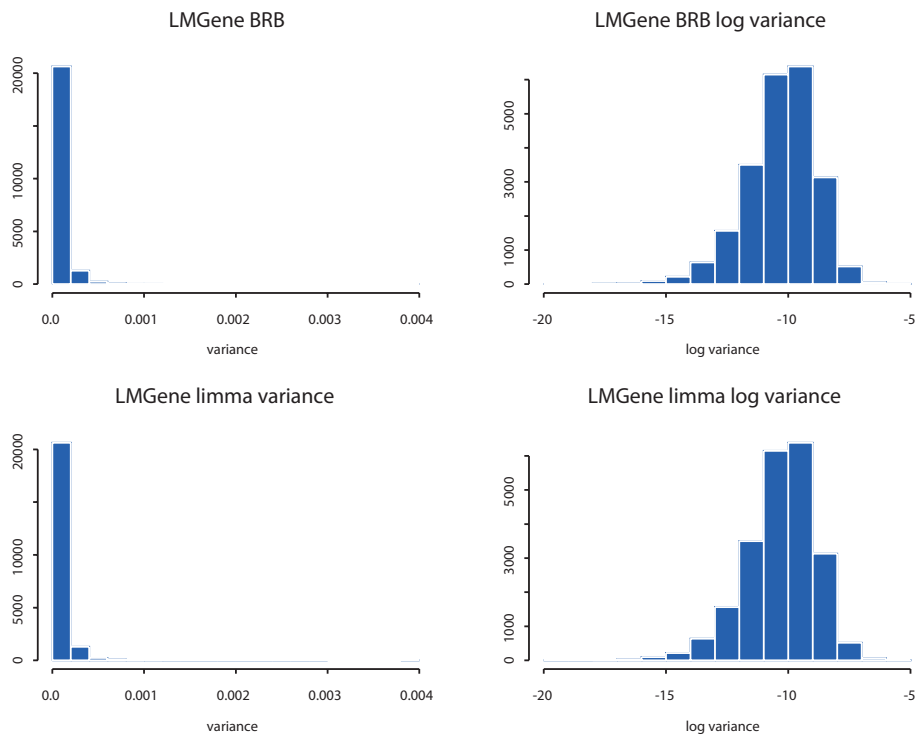

Figure 1: Histograms of posterior variances, logged and unlogged, for BRB and limma statistical tests using lmGene normalized data.

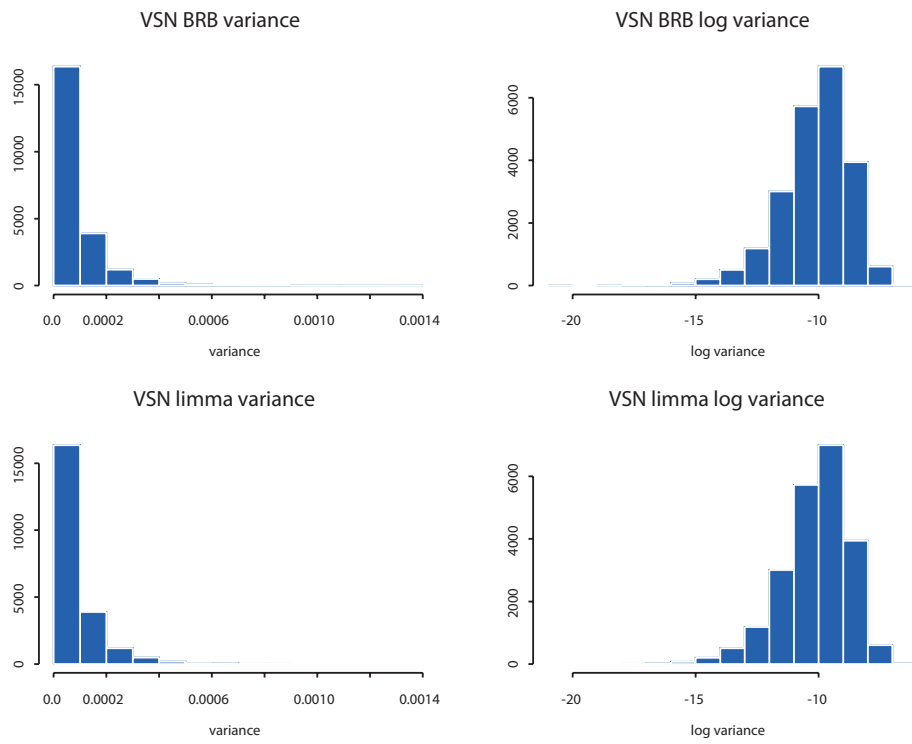

Figure 2: Histograms of posterior variances, logged and unlogged, for BRB and limma statistical tests using VSN normalized data.
