# Supplementary material for: Comparison of small n statistical tests of differential expression applied to microarrays
Source: PubMed Central journal article supplement (PMC2674054; doi:10.1186/1471-2105-10-45), 2009-02-03
Supplement: 1471-2105-10-45-S4.pdf [file 1471-2105-10-45-S4.pdf]

Supplementary Materials: Comparison of  
small n statistical tests of differential  
expression applied to microarrays  
Additional File 4

Carl Murie, Owen Woody, Anna Y. Lee , Robert Nadon

January 27, 2009

- 1 pAUC scores: Calculated using a 5% false positive rate**

Table 1: Rankings from best to worst (1 to 5) of average pAUC scores (using a threshold of five percent of the false positives) of the six tests of differential expression. The average pAUC for each score is in parentheses. Differential tests are t-stat: t-statistic, LPE: LPE z-statistic, CyberT: CyberT t-statistic, limma: limma moderated t-statistic, BRB: BRB t-statistic, FC: Fold Change. The lmGene package was used to apply the Loess normalization and glog transformation to the cDNA data. BC indicates that background correction was applied to the data before normalization.

|                           |                 | t-stat    | CyberT    | LPE       | BRB       | limma     | FC        | median pAUC |
|---------------------------|-----------------|-----------|-----------|-----------|-----------|-----------|-----------|-------------|
| HG133A                    | MAS 5.0         | 5 (.67)   | 1 (.72)   | 4 (.68)   | 2.5 (.69) | 2.5 (.69) | 6 (.18)   | .69         |
|                           | RMA             | 6 (.73)   | 3.5 (.84) | 3.5 (.84) | 3.5 (.84) | 3.5 (.84) | 1 (.86)   | .84         |
|                           | gcRMA           | 6 (.75)   | 2.5 (.84) | 2.5 (.84) | 4 (.79)   | 5 (.78)   | 1 (.86)   | .82         |
|                           | dChip           | 4.5 (.78) | 3 (.80)   | 6 (.77)   | 1.5 (.81) | 1.5 (.81) | 4.5 (.78) | .79         |
|                           | LMGene          | 6 (.73)   | 3.5 (.84) | 3.5 (.84) | 1.5 (.86) | 5 (.82)   | 1.5 (.84) | .84         |
|                           | VSN             | 6 (.73)   | 4 (.83)   | 4 (.83)   | 1.5 (.85) | 4 (.83)   | 1.5 (.85) | .83         |
|                           | avg. rank       | 5.6       | 2.9       | 3.9       | 2.4       | 3.6       | 2.6       |             |
| HG95                      | MAS 5.0         | 3 (.61)   | 1 (.73)   | 2 (.64)   | 4.5 (.46) | 4.5 (.46) | 6 (.10)   | .54         |
|                           | RMA             | 6 (.72)   | 1.5 (.87) | 1.5 (.87) | 3.5 (.85) | 3.5 (.85) | 5 (.84)   | .85         |
|                           | gcRMA           | 6 (.87)   | 1 (.95)   | 3 (.93)   | 3 (.93)   | 3 (.93)   | 5 (.92)   | .93         |
|                           | dChip           | 6 (.76)   | 3 (.84)   | 4 (.82)   | 1.5 (.86) | 1.5 (.86) | 5 (.81)   | .83         |
|                           | LMGene          | 6 (.76)   | 2 (.87)   | 1 (.89)   | 4 (.86)   | 4 (.86)   | 4 (.86)   | .86         |
|                           | VSN             | 6 (.61)   | 5 (.79)   | 3.5 (.82) | 1.5 (.83) | 3.5 (.82) | 1.5 (.83) | .82         |
|                           | avg. rank       | 5.5       | 2.3       | 2.5       | 3.0       | 3.3       | 4.4       |             |
| cDNA<br>liver vs<br>liver | Loess           | 5.5 (.97) | 2.5 (.98) | 2.5 (.98) | 2.5 (.98) | 2.5 (.98) | 5.5 (.97) | .98         |
|                           | Loess(BC)       | 5 (.96)   | 1 (.99)   | 2 (.98)   | 3.5 (.97) | 3.5 (.97) | 6 (.66)   | .97         |
|                           | glog Loess      | 6 (.94)   | 3 (.98)   | 3 (.98)   | 3 (.98)   | 3 (.98)   | 3 (.98)   | .98         |
|                           | glog Loess(BC)  | 6 (.93)   | 1.5 (.98) | 1.5 (.98) | 3.5 (.97) | 3.5 (.97) | 5 (.94)   | .97         |
|                           | VSN             | 6 (.95)   | 2.5 (.98) | 2.5 (.98) | 2.5 (.98) | 2.5 (.98) | 5(.97)    | .98         |
|                           | avg. rank       | 5.7       | 2.1       | 2.3       | 3.0       | 3.0       | 4.9       |             |
| cDNA<br>liver vs<br>pool  | Loess           | 6 (.07)   | 5 (.08)   | 1 (.26)   | 3.5 (.09) | 3.5 (.09) | 2 (.17)   | .09         |
|                           | Loess(BC)       | 2(.03)    | 5 (.02)   | 5 (.02)   | 2 (.03)   | 2 (.03)   | 5 (.02)   | .03         |
|                           | glog Loess      | 1 (.16))  | 4 (.13)   | 2 (.14)   | 4 (.13)   | 4 (.13)   | 6 (.08)   | .13         |
|                           | glog Loess(BC)  | 1.5 (.15) | 1.5 (.15) | 3 (.14)   | 4.5 (.09) | 4.5 (.09) | 6 (.06)   | .12         |
|                           | VSN             | 3 (.10)   | 4 (.09)   | 5.5 (.05) | 1.5 (.11) | 1.5 (.11) | 5.5 (.05) | .10         |
|                           | avg. rank       | 2.7       | 3.9       | 3.3       | 3.1       | 3.1       | 4.9       |             |
| Simulated                 | Common          | 6 (.32)   | 3 (.54)   | 5 (.46)   | 3 (.54)   | 1 (.55)   | 3 (.54)   | .54         |
|                           | Local           | 6 (.16)   | 4 (.28)   | 5 (.21)   | 2 (.61)   | 1 (.62)   | 3 (.31)   | .30         |
|                           | Inverse         | 5 (.40)   | 3 (.53)   | 6 (.39)   | 1.5 (.54) | 1.5 (.54) | 4 (.48)   | .50         |
|                           | Gamma           |           |           |           |           |           |           |             |
|                           | avg. rank       | 5.7       | 3.3       | 5.3       | 2.2       | 1.1       | 3.3       |             |
|                           | total avg. rank | 5.0       | 2.9       | 3.5       | 2.7       | 2.8       | 4.0       |             |
