# Supplementary material for: Comparison of small n statistical tests of differential expression applied to microarrays
Source: PubMed Central journal article supplement (PMC2674054; doi:10.1186/1471-2105-10-45), 2009-02-03
Supplement: 1471-2105-10-45-S6.pdf [file 1471-2105-10-45-S6.pdf]

Supplementary Materials: Comparison of  
small n statistical tests of differential  
expression applied to microarrays  
Additional File 6

Carl Murie, Owen Woody, Anna Y. Lee , Robert Nadon

January 28, 2009

**1 Total average rankings of statistical tests  
for pAUC and TPR**

Table 1: Average rankings of the 6 statistical tests for the pAUC using a 5% pvalue cutoff (Table 2 of the manuscript), the pAUC using a 5% false positive rate cutoff (Additional file 4), and the true positive rate (TPR) (Table 3 of the manuscript).

|                | <b>t-stat</b> | <b>CyberT</b> | <b>LPE</b> | <b>BRB</b> | <b>limma</b> | <b>FC</b> |
|----------------|---------------|---------------|------------|------------|--------------|-----------|
| pAUC (p value) | 5.0           | 2.2           | 5.0        | 2.6        | 2.3          | 3.7       |
| pAUC (FPR)     | 5.0           | 2.9           | 3.5        | 2.7        | 2.8          | 4.0       |
| TPR            | 5.0           | 2.3           | 5.1        | 2.5        | 2.9          | 3.1       |
